# Supplementary material for: Patterns of Invasive Growth in Malignant Gliomas—The Hippocampus Emerges as an Invasion-Spared Brain Region
Source: PubMed Central journal article supplement — Neoplasia. 2018 May 21;20(7):643–56. doi: 10.1016/j.neo.2018.04.001 (PMC6030235; doi:10.1016/j.neo.2018.04.001), 2018-05-21
Supplement: mmc1.pdf [file mmc1.pdf]

Supplementary File 1

| Primary Antibodies |           |            |          |               |                |
|--------------------|-----------|------------|----------|---------------|----------------|
| Antigen            | Raised in | Type       | Dilution | Producer      | Catalog Number |
| Hoechst            | -         | -          | 1:5000   | Invitrogen    | 33342          |
| Vimentin           | Goat      | Polyclonal | 1:100    | R&D           | AF2105         |
| Human Mitochondria | Mouse     | Monoclonal | 1:500    | Abcam         | ab92824        |
| Human Nestin       | Mouse     | Monoclonal | 1:200    | Abcam         | ab6320         |
| NAT12/NAA30        | Rabbit    | NA         | 1:200    | Sigma-Aldrich | AV48508        |
| Ki67               | Rabbit    | Monoclonal | 1:500    | Abcam         | ab16667        |
| Sox2               | Goat      | Polyclonal | 1:200    | R&D           | AF2018         |
| Human Nuclei       | Mouse     | Monoclonal | 1:100    | Millipore     | MAB1281        |
| GFP                | Rabbit    | Polyclonal | 1:200    | Abcam         | ab290          |

| Secondary Antibodies |           |                    |          |            |                |
|----------------------|-----------|--------------------|----------|------------|----------------|
| Dye                  | Raised in | Species reactivity | Dilution | Producer   | Catalog Number |
| Alexa Fluor 488      | Donkey    | Mouse              | 1:500    | Invitrogen | A-11059        |
| Alexa Fluor 488      | Donkey    | Rabbit             | 1:500    | Invitrogen | A-21206        |
| Alexa Fluor 488      | Donkey    | Goat               | 1:500    | Invitrogen | A-11055        |
| Alexa Fluor 594      | Donkey    | Mouse              | 1:500    | Invitrogen | A-21203        |
| Alexa Fluor 594      | Donkey    | Rabbit             | 1:500    | Invitrogen | A-21207        |
| Alexa Fluor 594      | Donkey    | Goat               | 1:500    | Invitrogen | A-11058        |
| Alexa Fluor 647      | Donkey    | Mouse              | 1:500    | Invitrogen | A-31571        |
| Alexa Fluor 647      | Donkey    | Rabbit             | 1:500    | Invitrogen | A-31573        |
| Alexa Fluor 647      | Donkey    | Goat               | 1:500    | Invitrogen | A-21447        |
