# Supplementary material for: Patterns of Invasive Growth in Malignant Gliomas—The Hippocampus Emerges as an Invasion-Spared Brain Region
Source: PubMed Central journal article supplement — Neoplasia. 2018 May 21;20(7):643–56. doi: 10.1016/j.neo.2018.04.001 (PMC6030235; doi:10.1016/j.neo.2018.04.001), 2018-05-21
Supplement: mmc2.pdf [file mmc2.pdf]

## Supplementary File 2

### MRI-based evaluation of malignant TLGs

| Feature number | Name                                                                      | Description                                                                                                                                                                                                                                                                                                                                                                                                                                                                                                                                                                                                                           | Options                                                                                                       |
|----------------|---------------------------------------------------------------------------|---------------------------------------------------------------------------------------------------------------------------------------------------------------------------------------------------------------------------------------------------------------------------------------------------------------------------------------------------------------------------------------------------------------------------------------------------------------------------------------------------------------------------------------------------------------------------------------------------------------------------------------|---------------------------------------------------------------------------------------------------------------|
| F1a*           | <b>Tumor core assessed by T<sub>1</sub> with contrast</b>                 | <p><b>Mediobasal</b><br/>Lesions occupying structures lying medial to and immediately lateral to the collateral sulcus including amygdala, hippocampus, parahippocampus and fusiform gyrus.</p> <p><b>Insular-temporo-opercular</b><br/>More lateral lesions located in the temporal stem involving the insula or temporo-opercular regions</p> <p><b>Orbitofrontal-Insular-Temporal pole</b><br/>Larger tumors extending into the frontal lobe including the basal ganglia</p> <p><b>Non-limbic lateral</b><br/>All other tumors of the temporal lobe including lesions occupying T1-T3 with possible extension into other lobes</p> | <p><b>0= -</b></p> <p><b>1= mbT</b></p> <p><b>2= I-TO</b></p> <p><b>3= FO-I-TP</b></p> <p><b>4= nl-IT</b></p> |
| F1b            |                                                                           | <p><b>Affection of the amygdalo-hippocampal complex</b></p>                                                                                                                                                                                                                                                                                                                                                                                                                                                                                                                                                                           | <p><b>0= -</b></p> <p><b>1= No</b></p> <p><b>2= Yes</b></p>                                                   |
| F2a*           | <b>Tumor extension assessed by T<sub>2</sub>/FLAIR signal-abnormality</b> | <p><b>Mediobasal</b><br/>Lesions occupying structures lying medial to and immediately lateral to the collateral sulcus including amygdala, hippocampus, parahippocampus and fusiform gyrus.</p> <p><b>Insular-temporo-opercular</b><br/>More lateral lesions located in the temporal stem involving the insula or temporo-opercular regions</p>                                                                                                                                                                                                                                                                                       | <p><b>0= -</b></p> <p><b>1= mbT</b></p> <p><b>2= I-TO</b></p> <p><b>3= FO-I-TP</b></p> <p><b>4= nl-IT</b></p> |

|                 |                                   |                                                                                                                                                                                                                                                                                                                   |                                                                |
|-----------------|-----------------------------------|-------------------------------------------------------------------------------------------------------------------------------------------------------------------------------------------------------------------------------------------------------------------------------------------------------------------|----------------------------------------------------------------|
|                 |                                   | <p><b>Orbitofrontal-Insular-Temporal pole</b><br/>Larger tumors extending into the frontal lobe including the basal ganglia</p> <p><b>Non-limbic lateral</b><br/>All other tumors of the temporal lobe including lesions occupying T1-T3 with possible extension into other lobes</p>                             |                                                                |
| F2b             |                                   | <b>Affection of the amygdalo-hippocampal complex</b>                                                                                                                                                                                                                                                              | <p>0= -</p> <p>1= No</p> <p>2= Yes</p>                         |
| F3 <sup>¤</sup> | <b>Tumor side</b>                 | Side of lesion epicenter                                                                                                                                                                                                                                                                                          | <p>0= -</p> <p>1= right</p> <p>2= left</p> <p>3= bilateral</p> |
| F4 <sup>¤</sup> | <b>Satellites</b>                 | An area of enhancement within the region of T2/FLAIR signal abnormality surrounding the dominant lesion but not contiguous in any part with the major tumor mass.                                                                                                                                                 | <p>0= -</p> <p>1= No</p> <p>2= Yes</p>                         |
| F5 <sup>¤</sup> | <b>Multifocal or multicentric</b> | <p><b>Multifocal:</b> as having at least one region of tumor, either enhancing or non-enhancing, which is not contiguous with the dominant lesion and is outside the region of T2/FLAIR signal abnormality.</p> <p><b>Multicentric:</b> widely separated lesions in different lobes or different hemispheres.</p> | <p>0= -</p> <p>1= multifocal</p> <p>2= multicentric</p>        |
| F6 <sup>¤</sup> | <b>Ependymal enhancement/SVZ+</b> | Invasion of any adjacent ependymal surface in continuity with enhancing or non-enhancing tumor matrix                                                                                                                                                                                                             | <p>0= -</p> <p>1= No</p> <p>2= Yes</p>                         |

\* F1a and F2a modified or adapted from:

- Yasargil, M.G. et al., Acta Neurochir, 1992. **118**(1-2): p. 40-52.

- Capizzano, A.A. et al., Clin Neuroradiol, 2015. **25**(2): p. 127-35.

<sup>¤</sup> F3-F6 adapted from VASARI.
