# Supplementary material for: Patterns of Invasive Growth in Malignant Gliomas—The Hippocampus Emerges as an Invasion-Spared Brain Region
Source: PubMed Central journal article supplement — Neoplasia. 2018 May 21;20(7):643–56. doi: 10.1016/j.neo.2018.04.001 (PMC6030235; doi:10.1016/j.neo.2018.04.001), 2018-05-21
Supplement: mmc4.pdf [file mmc4.pdf]

Supplementary File 4

| Tumor # | Clinical features |     |                 | Pathological features |                | MRI feaures          |                  |                   |                   |            |             |           |
|---------|-------------------|-----|-----------------|-----------------------|----------------|----------------------|------------------|-------------------|-------------------|------------|-------------|-----------|
|         | Gender            | Age | Survival (days) | Histology             | Molecular data | Tumor type           | HPC/AMG          | HPC/AMG           | Tumor             | Satellites | Multiple C+ | SVZ+      |
|         |                   |     |                 |                       |                | (T1CE)<br><i>F1a</i> | C+<br><i>F1b</i> | FL+<br><i>F2b</i> | side<br><i>F3</i> | <i>F4</i>  | <i>F5</i>   | <i>F6</i> |
| 1       | M                 | 55  | NA              | GBM                   | IDH1/2 WT      | 2                    | N                | N                 | R                 | N          | N           | N         |
| 2       | F                 | 66  | NA              | GBM                   | IDH1/2 WT      | 2                    | Y                | Y                 | L                 | N          | N           | Y         |
| 3       | M                 | 58  | 542             | GBM                   | IDH1/2 WT      | 3                    | N                | N                 | R                 | N          | N           | N         |
| 4       | M                 | 58  | 388             | GBM                   | IDH1/2 WT      | 2                    | Y                | Y                 | R                 | N          | N           | Y         |
| 5       | F                 | 52  | 550             | GBM                   | IDH1/2 WT      | 4                    | N                | N                 | R                 | N          | MF          | N         |
| 6       | M                 | 46  | NA              | GBM                   | IDH1/2 WT      | 4                    | N                | N                 | R                 | N          | N           | N         |
| 7       | M                 | 54  | 416             | GBM                   | IDH1/2 WT      | 4                    | Y                | Y                 | L                 | N          | N           | Y         |
| 8       | M                 | 70  | 372             | GBM                   | IDH1/2 WT      | 4                    | N                | N                 | L                 | N          | MF          | N         |
| 9       | M                 | 52  | 489             | GBM                   | IDH1/2 WT      | 2                    | N                | N                 | L                 | N          | N           | N         |
| 10      | M                 | 51  | 647             | GBM                   | IDH1/2 WT      | 1                    | N                | Y                 | R                 | N          | MC          | N         |
| 11      | M                 | 73  | 405             | GBM                   | IDH1/2 WT      | 3                    | Y                | Y                 | R                 | N          | N           | Y         |
| 12      | M                 | 74  | 340             | GBM                   | IDH1/2 WT      | 4                    | N                | N                 | L                 | N          | N           | N         |
| 13      | M                 | 73  | 124             | GBM                   | IDH1/2 WT      | 4                    | N                | N                 | L                 | N          | N           | N         |
| 14      | F                 | 68  | 414             | GBM                   | IDH1/2 WT      | 2                    | N                | N                 | R                 | N          | N           | Y         |
| 15      | M                 | 76  | 118             | ACIII                 | IDH1/2 WT      | 4                    | Y                | Y                 | L                 | Y          | MF          | Y         |
| 16      | F                 | 75  | 280             | ACIII                 | IDH1/2 WT      | 1                    | Y                | Y                 | R                 | N          | N           | N         |
| 17      | M                 | 47  | NA              | ACIII                 | IDH1 pos       | 2                    | Y                | Y                 | R                 | N          | N           | N         |
| 18      | F                 | 71  | 607             | GBM                   | IDH1 WT        | 2                    | N                | N                 | L                 | N          | N           | Y         |
| 19      | M                 | 67  | NA              | GBM                   | IDH1 WT        | 4                    | N                | N                 | L                 | Y          | N           | N         |
| 20      | F                 | 40  | 219             | GBM                   | IDH1/2 WT      | 2                    | N                | Y                 | R                 | Y          | N           | Y         |
| 21      | F                 | 66  | 666             | ACIII                 | IDH1/2 WT      | 4                    | N                | N                 | L                 | Y          | N           | N         |
| 22      | M                 | 66  | 367             | GBM                   | IDH1/2 WT      | 3                    | N                | N                 | R                 | N          | N           | Y         |
| 23      | M                 | 64  | NA              | GBM                   | IDH1/2 WT      | 2                    | N                | N                 | R                 | N          | N           | Y         |
| 24      | F                 | 62  | 210             | GBM                   | IDH1 WT        | 1                    | Y                | Y                 | R                 | N          | N           | Y         |
| 25      | M                 | 74  | 430             | GBM                   | IDH1/2 WT      | 2                    | N                | Y                 | L                 | N          | N           | N         |
| 26      | F                 | 67  | 187             | GBM                   | IDH1 WT        | 1                    | Y                | Y                 | R                 | Y          | N           | Y         |
| 27      | M                 | 65  | NA              | GBM                   | IDH1 WT        | 2                    | N                | N                 | R                 | N          | N           | N         |
| 28      | F                 | 68  | 307             | GBM                   | IDH1 WT        | 1                    | Y                | Y                 | R                 | Y          | MC          | Y         |

|    |   |    |     |             |              |   |   |   |    |   |    |   |
|----|---|----|-----|-------------|--------------|---|---|---|----|---|----|---|
| 29 | F | 56 | 45  | GBM         | IDH1 WT      | 4 | N | N | BL | Y | MC | N |
| 30 | M | 54 | 333 | ACIII       | IDH1/2 WT    | 2 | N | N | L  | N | N  | N |
| 31 | M | 65 | 420 | GBM         | IDH1/2 WT    | 4 | N | N | L  | N | N  | N |
| 32 | M | 48 | 458 | GBM         | IDH1/2 WT    | 1 | Y | Y | R  | N | N  | Y |
| 33 | M | 60 | NA  | GBM         | IDH1 WT      | 4 | N | N | L  | N | N  | N |
| 34 | M | 49 | NA  | ACIII       | IDH1 pos     | 3 | N | N | L  | N | N  | N |
|    |   |    |     |             | 1p/19q loss  |   |   |   |    |   |    |   |
| 35 | M | 65 | 560 | GBM         | IDH1/2 WT    | 1 | Y | Y | R  | N | N  | Y |
| 36 | F | 63 | NA  | GBM         | IDH1/2 WT    | 4 | N | N | L  | N | N  | N |
| 37 | M | 74 | 200 | GBM         | IDH1/2 WT    | 4 | N | N | L  | N | N  | Y |
| 38 | M | 80 | 88  | GBM         | IDH1/2 WT    | 2 | Y | Y | R  | N | N  | Y |
| 39 | M | 72 | 410 | GBM         | IDH1 WT      | 4 | N | N | R  | N | N  | N |
| 40 | F | 46 | 662 | GBM         | IDH1/2 WT    | 4 | N | N | L  | N | N  | N |
| 41 | M | 56 | 204 | GBM         | IDH1/2 WT    | 4 | N | N | R  | N | N  | Y |
| 42 | M | 66 | 422 | GBM         | IDH1 WT      | 4 | N | N | L  | N | N  | N |
|    |   |    |     | Gliosarcoma |              |   |   |   |    |   |    |   |
| 43 | M | 70 | 581 | ACIII       | IDH1 WT      | 4 | N | N | L  | Y | N  | N |
| 44 | M | 68 | 420 | GBM         | IDH1 WT      | 4 | N | N | R  | Y | N  | N |
| 45 | F | 75 | 576 | GBM         | IDH1 WT      | 4 | N | N | L  | N | N  | Y |
| 46 | M | 82 | 327 | GBM         | Not known    | 2 | N | N | R  | Y | N  | N |
| 47 | M | 47 | 200 | GBM         | IDH1 WT      | 2 | N | N | R  | N | N  | Y |
| 48 | M | 63 | 353 | GBM         | IDH1 WT      | 2 | N | N | L  | N | N  | Y |
| 49 | M | 50 | 610 | GBM         | IDH1 WT      | 4 | N | N | R  | N | N  | N |
| 50 | M | 69 | 540 | ACIII       | IDH1 WT      | 4 | N | N | L  | N | N  | N |
|    |   |    |     |             | 1p19q intact |   |   |   |    |   |    |   |
| 51 | M | 58 | 364 | GBM         | IDH1 WT      | 2 | N | N | R  | N | N  | Y |
| 52 | F | 64 | 761 | ACIII       | IDH1 WT      | 2 | Y | Y | L  | Y | N  | Y |
| 53 | M | 61 | 138 | ACIII       | IDH1 WT      | 2 | Y | Y | R  | Y | N  | Y |
| 54 | M | 78 | 383 | GBM         | IDH1/2 WT    | 4 | N | N | L  | N | N  | N |
| 55 | M | 71 | 146 | GBM         | IDH1 WT      | 2 | N | Y | R  | Y | N  | N |
| 56 | M | 60 | 109 | GBM         | IDH1 WT      | 4 | N | N | R  | N | N  | Y |
| 57 | M | 75 | 262 | GBM         | IDH1 WT      | 3 | N | Y | R  | Y | MF | Y |
| 58 | F | 66 | 532 | GBM         | IDH1/2 WT    | 2 | N | N | R  | Y | N  | Y |
| 59 | M | 65 | 263 | GBM         | IDH1/2 WT    | 4 | N | N | L  | Y | N  | Y |

|    |   |    |      |       |           |   |   |   |   |   |   |   |
|----|---|----|------|-------|-----------|---|---|---|---|---|---|---|
| 60 | M | 67 | 582  | GBM   | IDH1/2 WT | 1 | N | N | L | N | N | N |
| 61 | M | 54 | 1183 | GBM   | IDH1/2 WT | 2 | Y | Y | L | N | N | Y |
| 62 | F | 63 | 558  | GBM   | IDH1 WT   | 4 | N | N | L | N | N | N |
| 63 | M | 33 | 267  | GBM   | IDH1 WT   | 3 | Y | Y | R | Y | N | Y |
| 64 | F | 54 | 377  | GBM   | IDH1/2 WT | 2 | N | N | R | N | N | N |
| 65 | F | 58 | NA   | GBM   | IDH1/2 WT | 4 | N | N | L | Y | N | N |
| 66 | M | 47 | 639  | ACIII | IDH1 WT   | 4 | N | N | R | N | N | N |
| 67 | M | 60 | 145  | ACIII | IDH1 WT   | 2 | N | N | L | N | N | N |
| 68 | M | 76 | 296  | GBM   | IDH1 WT   | 3 | N | N | L | Y | N | N |
| 69 | F | 72 | 288  | GBM   | IDH1 WT   | 4 | N | Y | R | N | N | Y |
| 70 | M | 70 | 215  | GBM   | IDH1 WT   | 1 | Y | Y | L | Y | N | Y |
