# Supplementary material for: Patterns of Invasive Growth in Malignant Gliomas—The Hippocampus Emerges as an Invasion-Spared Brain Region
Source: PubMed Central journal article supplement — Neoplasia. 2018 May 21;20(7):643–56. doi: 10.1016/j.neo.2018.04.001 (PMC6030235; doi:10.1016/j.neo.2018.04.001), 2018-05-21
Supplement: mmc5.pdf [file mmc5.pdf]

## Supplementary File 5

### TLG patient data

| Tumor type (based on c+) |                                     | Total # | Histological data |     | Molecular data | MRI data             |    |    |     |       |      |             |
|--------------------------|-------------------------------------|---------|-------------------|-----|----------------|----------------------|----|----|-----|-------|------|-------------|
|                          |                                     |         |                   |     |                | Contrast-enhancement |    |    |     |       |      | FLAIR       |
|                          |                                     |         | AA                | GBM | IDH WT         | HPC/AMG C+           | R  | L  | Sat | MF/MC | SVZ+ | HPC/AMG FL+ |
| 1                        | Mediobasal                          | 9       | 1                 | 8   | 9              | 7                    | 7  | 1  | 3   | 2     | 7    | 9           |
| 2                        | Insular-temporo-opercular           | 24      | 5                 | 19  | 22             | 7                    | 15 | 9  | 6   | 0     | 14   | 10          |
| 3                        | Orbitofrontal-insular-temporal pole | 7       | 1                 | 6   | 6              | 2                    | 5  | 2  | 3   | 1     | 4    | 3           |
| 4                        | Non-limbic lateral                  | 30      | 5                 | 25  | 30             | 2                    | 9  | 20 | 8   | 4     | 8    | 3           |
| <b>Total</b>             |                                     | 70      | 12                | 58  | 67             | 18                   | 36 | 32 | 20  | 7     | 33   | 25          |

| Tumor type (based on c+) | Total      | AA | GBM | IDH WT | HPC/AM C+ | HPC/AM FL+ | R  | L  | Sat | MF/MC | SVZ+ |
|--------------------------|------------|----|-----|--------|-----------|------------|----|----|-----|-------|------|
| 1                        | Mediobasal | 9  | 1   | 8      | 9         | 7          | 7  | 1  | 3   | 2     | 7    |
| 2-4                      | Lateral    | 61 | 11  | 50     | 58        | 11         | 29 | 31 | 17  | 5     | 26   |

\* IDH1 status not available for 1 patient with type 2 tumor

§ One type 4 tumor was bilateral
