# Supplementary figures and images for: Patterns of Invasive Growth in Malignant Gliomas—The Hippocampus Emerges as an Invasion-Spared Brain Region
Source: PubMed Central journal article supplement — Neoplasia. 2018 May 21;20(7):643–56. doi: 10.1016/j.neo.2018.04.001 (PMC6030235; doi:10.1016/j.neo.2018.04.001), 2018-05-21

**Supplementary Figure 2**

**Mitochondrial staining density in GIC-derived xenografts**

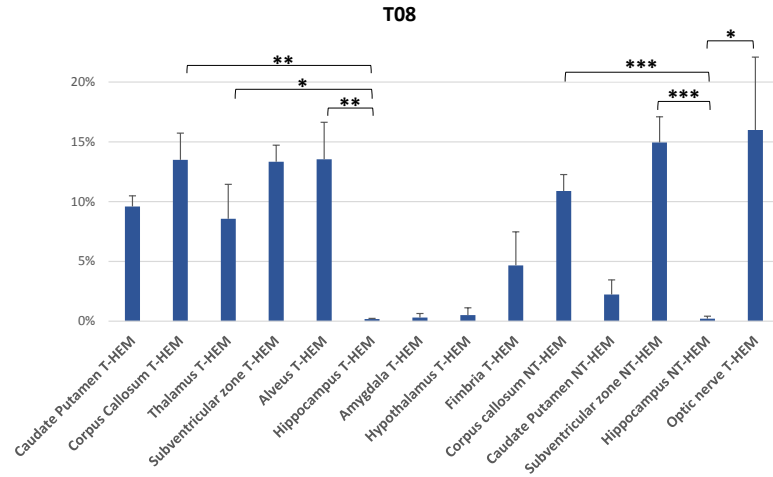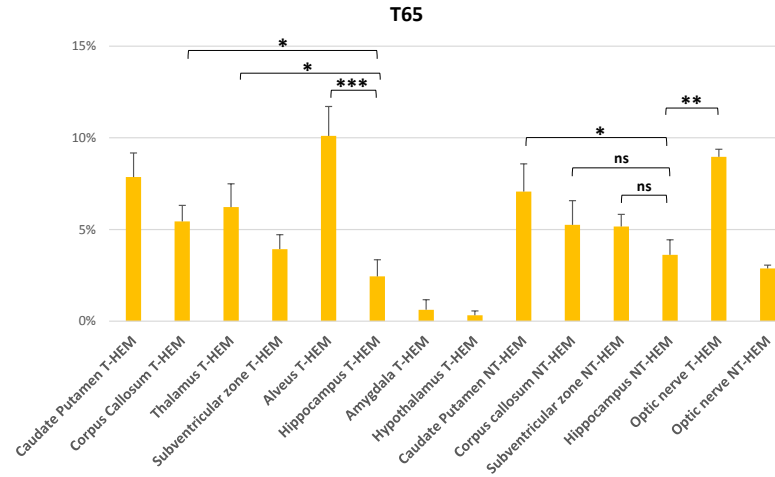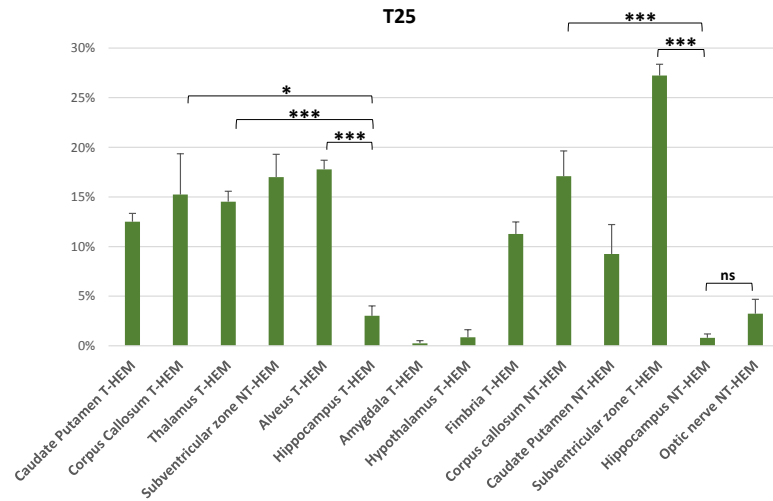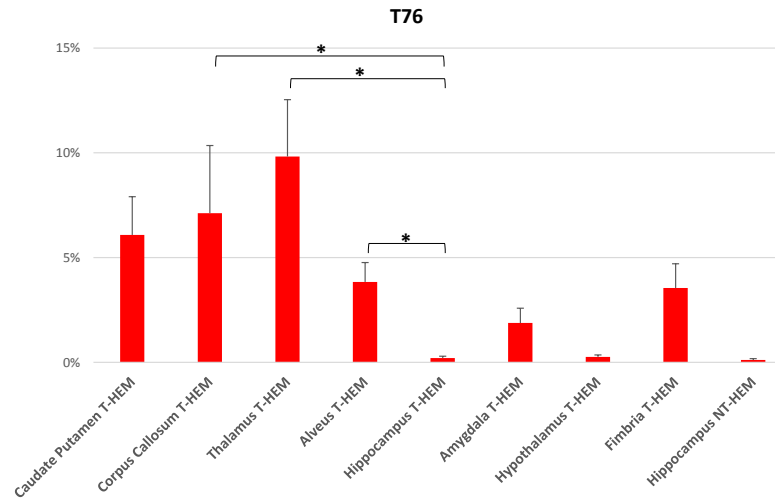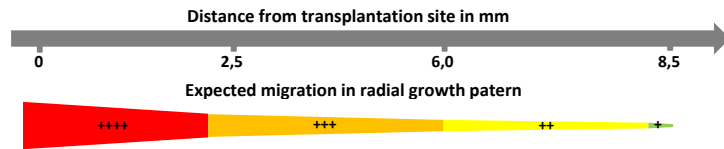

\* = p<0.05  
 \*\* = p<0.01  
 \*\*\* = p<0,001

Supplement: mmc6.pdf [file mmc6.pdf]

### Supplementary Figure 3

#### GFP staining density in PDGF-B mice

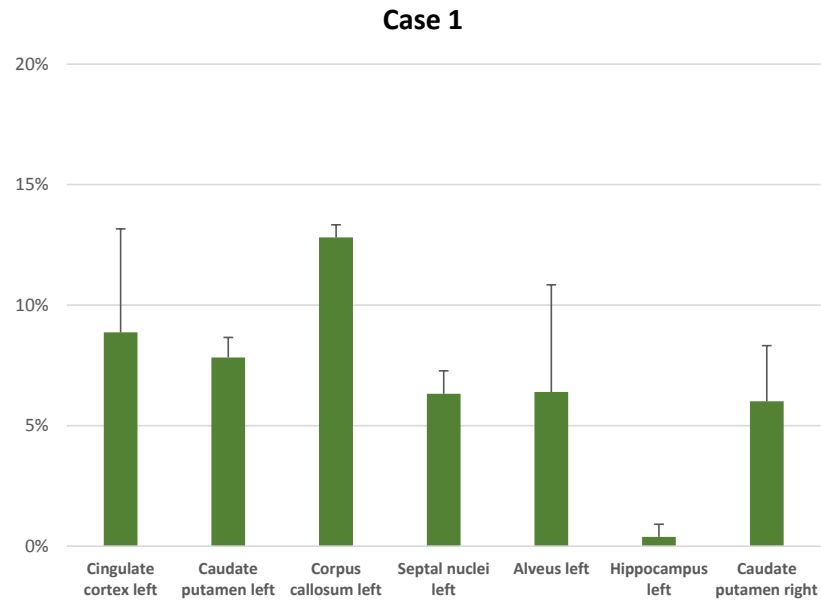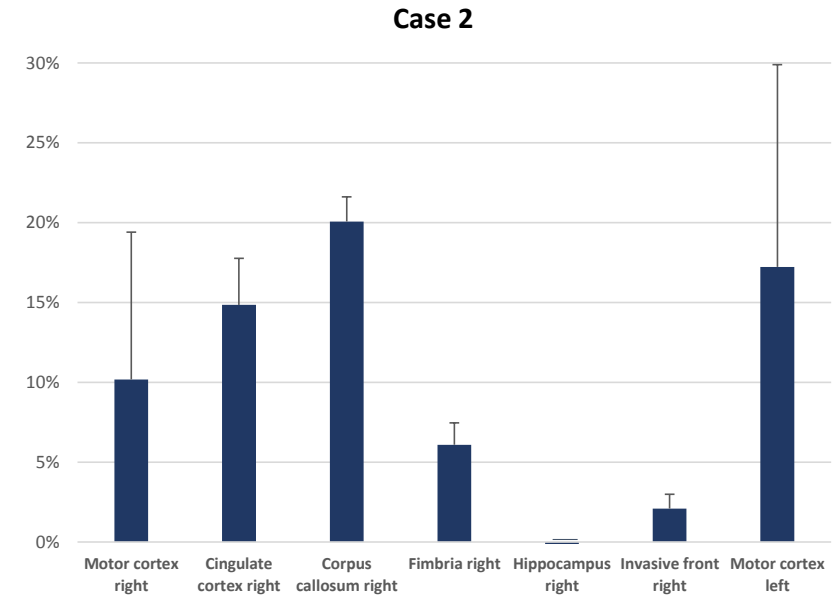

Supplement: mmc7.pdf [file mmc7.pdf]
